# Supplementary material
Source: publisher site journal article supplement (https://www.dovepress.com/article/405904)
Supplement: Supplementary file 1 [file get_supplementary_file.php]

Annex 1

To assess your level of stress over the last 2 weeks, please complete the following questionnaire.

Age: ....

Gender: F / M

Environment: Urban/Rural

Below is a list of words that describe the emotions you may experience in different situations. For each word mark the answer that matches with an "X" on the answer sheet.

In the last 2 weeks have you felt

PDA questionnaire:

| Number | Type of emotion | Very much | Much | Medium | Very little | Not at all |
| --- | --- | --- | --- | --- | --- | --- |
|  | Optimist |  |  |  |  |  |
|  |  | Not at all | Very little | Medium | Much | Very much |
|  | Tense |  |  |  |  |  |
|  |  | Not at all | Very little | Medium | Much | Very much |
|  | Sad |  |  |  |  |  |
|  |  | Not at all | Very little | Medium | Much | Very much |
|  | Melancholic |  |  |  |  |  |
|  |  | Very much | Much | Medium | Very little | Not at all |
|  | Cheerful |  |  |  |  |  |
|  |  | Very much | Much | Medium | Very little | Not at all |
|  | Enthusiastic |  |  |  |  |  |
|  |  | Not at all | Very little | Medium | Much | Very much |
|  | Worried |  |  |  |  |  |
|  |  | Not at all | Very little | Medium | Much | Very much |
|  | Bitter |  |  |  |  |  |
|  |  | Very much | Much | Medium | Very little | Not at all |
|  | Happy |  |  |  |  |  |
|  |  | Very much | Much | Medium | Very little | Not at all |
|  | Well-disposed |  |  |  |  |  |
|  |  | Not at all | Very little | Medium | Much | Very much |
|  | Anxious |  |  |  |  |  |
|  |  | Not at all | Very little | Medium | Much | Very much |
|  | Despondent |  |  |  |  |  |
|  |  | Very much | Much | Medium | Very little | Not at all |
|  | Joyful |  |  |  |  |  |
|  |  | Not at all | Very little | Medium | Much | Very much |
|  | Concerned |  |  |  |  |  |
|  |  | Very much | Much | Medium | Very little | Not at all |
|  | Flights |  |  |  |  |  |
|  |  | Not at all | Very little | Medium | Much | Very much |
|  | Scared |  |  |  |  |  |
|  |  | Very much | Much | Medium | Very little | Not at all |
|  | Content |  |  |  |  |  |
|  |  | Not at all | Very little | Medium | Much | Very much |
|  | Annoyed |  |  |  |  |  |
|  |  | Not at all | Very little | Medium | Much | Very much |
|  | Stubborn |  |  |  |  |  |
|  |  | Very much | Much | Medium | Very little | Not at all |
|  | Satisfied |  |  |  |  |  |
|  |  | Not at all | Very little | Medium | Much | Very much |
|  | Saddened |  |  |  |  |  |
|  |  | Not at all | Very little | Medium | Much | Very much |
|  | Terrified |  |  |  |  |  |
|  |  | Not at all | Very little | Medium | Much | Very much |
|  | Nervous |  |  |  |  |  |
|  |  | Very much | Much | Medium | Very little | Not at all |
|  | Excited |  |  |  |  |  |
|  |  | Not at all | Very little | Medium | Much | Very much |
|  | Useless |  |  |  |  |  |
|  |  | Not at all | Very little | Medium | Much | Very much |
|  | Grieving |  |  |  |  |  |
|  |  | Not at all | Very little | Medium | Much | Very much |
|  | Alarmed |  |  |  |  |  |
|  |  | Not at all | Very little | Medium | Much | Very much |
|  | Panicked |  |  |  |  |  |
|  |  | Not at all | Very little | Medium | Much | Very much |
|  | Angry |  |  |  |  |  |
|  |  | Not at all | Very little | Medium | Much | Very much |
|  | Distraught |  |  |  |  |  |
|  |  | Very much | Much | Medium | Very little | Not at all |
|  | Jovial |  |  |  |  |  |
|  |  | Not at all | Very little | Medium | Much | Very much |
|  | Desperate |  |  |  |  |  |
|  |  | Very much | Much | Medium | Very little | Not at all |
|  | Dynamic |  |  |  |  |  |
|  |  | Not at all | Very little | Medium | Much | Very much |
|  | Restless |  |  |  |  |  |
|  |  | Not at all | Very little | Medium | Much | Very much |
|  | Frightened |  |  |  |  |  |
|  |  | Very much | Much | Medium | Very little | Not at all |
|  | Full of vitality |  |  |  |  |  |
|  |  | Not at all | Very little | Medium | Much | Very much |
|  | Disappointed |  |  |  |  |  |
|  |  | Not at all | Very little | Medium | Much | Very much |
|  | Hopeless |  |  |  |  |  |
|  |  | Not at all | Very little | Medium | Much | Very much |
|  | Depressed |  |  |  |  |  |
|  |  | Not at all | Very little | Medium | Much | Very much |

Annex 2

Cut-off points for profile of affective dysfunctions

Annex2.1.

| Total PDA | | |
| --- | --- | --- |
| Class | Description | Cut-off |
| I | Very low level of distress | ≤ 28 |
| II | Low level of distress | 29-39 |
| III | Medium level of distress | 40-56 |
| IV | High level of distress | 57-86 |
| V | Very high level of distress | ≥ 87 |

Annex2.2.

| Dysfunctional PDA | | |
| --- | --- | --- |
| Class | Description | Cut-off |
| I | Very low level of dysfunctional negative emotions | ≤ 14 |
| II | Low level of dysfunctional negative emotions | 15-17 |
| III | Medium level of dysfunctional negative emotions | 18-25 |
| IV | High level of dysfunctional negative emotions | 26-42 |
| V | Very high level of dysfunctional negative emotions | ≥ 43 |

Annex2.3.

| Functional PDA for women | | |
| --- | --- | --- |
| Class | Description | Cut-off |
| I | Very low level of functional negative emotions | ≤ 15 |
| II | Low level of functional negative emotions | 16-22 |
| III | Medium level of functional negative emotions | 23-31 |
| IV | High level of functional negative emotions | 32-43 |

Annex2.4

| Functional PDA for men | | |
| --- | --- | --- |
| Class | Description | Cut-off |
| I | Very low level of functional negative emotions | ≤ 14 |
| II | Low level of functional negative emotions | 15-22 |
| III | Medium level of functional negative emotions | 23-30 |
| IV | High level of functional negative emotions | 31-43 |
| V | Very high level of functional negative emotions | ≥ 43 |
